# Supplementary material for: A combined experimental inelastic neutron scattering, Raman and ab initio lattice dynamics study of α-lithium amidoborane
Source: Royal Society of Chemistry journal article supplement (doi:10.1039/c1cp20587k), 2011-01-01
Supplement: c1cp20587k.pdf [file c1cp20587k.pdf]

## A Combined Experimental Inelastic Neutron Scattering, Raman and *ab initio* Lattice Dynamics Study of $\alpha$ -Lithium Amidoborane – Supplementary Information

**Table 1** Geometry optimised atomic coordinates of  $\alpha$ -LiNH<sub>2</sub>BH<sub>3</sub> used in the DFT calculation. Unit cell parameters  $a = 13.932889 \text{ \AA}$ ,  $b = 5.149909 \text{ \AA}$ ,  $c = 7.102219 \text{ \AA}$ ; space group *Pbca*.

| Atom | x/a      | y/b      | z/c      | Wyckoff Positions |
|------|----------|----------|----------|-------------------|
| H1   | 0.611029 | 0.858219 | 0.172610 | 1a                |
| H2   | 0.725859 | 0.087439 | 0.177109 | 1a                |
| H3   | 0.679709 | 0.943300 | 0.933629 | 1a                |
| H4   | 0.531589 | 0.245910 | 0.983009 | 1a                |
| H5   | 0.574639 | 0.364509 | 0.178460 | 1a                |
| Li1  | 0.677089 | 0.557659 | 0.931699 | 1a                |
| B1   | 0.653249 | 0.034329 | 0.087090 | 1a                |
| N1   | 0.594730 | 0.282559 | 0.052090 | 1a                |

**Table 2** Experimental and calculated bond lengths of  $\alpha$ -LiNH<sub>2</sub>BH<sub>3</sub> with % error.

| Bond  | Experimental (Å) | Calculated (Å) | % Error |
|-------|------------------|----------------|---------|
| Li-N  | 1.992            | 2.013          | 1.089   |
| B-N   | 1.541            | 1.536          | -0.292  |
| N-H1  | 0.989            | 1.024          | 3.62    |
| N-H2  | 0.989            | 1.030          | 4.196   |
| B-H3  | 1.223            | 1.227          | 0.376   |
| B-H4  | 1.223            | 1.240          | 1.39    |
| B-H5  | 1.223            | 1.242          | 1.586   |
| Li-B1 | 2.552            | 2.515          | -1.458  |
| Li-B2 | 2.686            | 2.611          | -2.777  |
| Li-B3 | 2.692            | 2.711          | 0.747   |

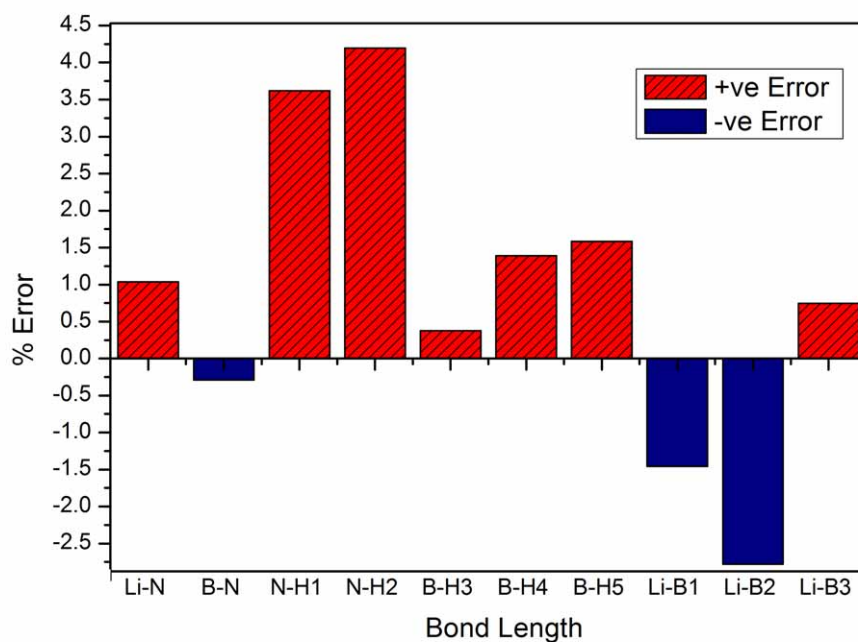

**Figure 1** Histogram showing the % error between the experimental and calculated bond lengths of  $\alpha$ -LiNH<sub>2</sub>BH<sub>3</sub>.

**Table 3** Wavenumbers and assignments for the observed bands of  $\alpha$ -LiNH<sub>2</sub>BH<sub>3</sub>.

| INS<br>(cm <sup>-1</sup> ) | DFT<br>(cm <sup>-1</sup> ) | Raman<br>(cm <sup>-1</sup> ) | DFT<br>(cm <sup>-1</sup> ) | Assignment                      | Mulliken<br>group theory<br>labels<br>irreducible<br>representations |
|----------------------------|----------------------------|------------------------------|----------------------------|---------------------------------|----------------------------------------------------------------------|
| -                          | -0.08                      |                              |                            | Anharmonic acoustic translation | a                                                                    |
| -                          | -0.07                      |                              |                            | Anharmonic acoustic translation | b                                                                    |
| -                          | -0.05                      |                              |                            | Translation                     | c                                                                    |
| 39.00w                     | 29.48                      |                              |                            | Translation                     | d                                                                    |
| -                          | 57.66                      |                              |                            | Anharmonic translation          | e                                                                    |
| 77.00m                     | 78.76                      |                              |                            | Anharmonic translation          | f                                                                    |
| 80.00m                     | 88.38                      |                              |                            | Lattice Libration               | a                                                                    |
| -                          | 88.92                      |                              |                            | Lattice Libration               | g                                                                    |
| -                          | 90.67                      |                              |                            | Lattice Libration               | c                                                                    |
| -                          | 93.18                      |                              |                            | Lattice Libration               | d                                                                    |
| 99.00s                     | 94.42                      |                              |                            | Lattice Libration               | f                                                                    |
| 113.00m                    | 94.61                      |                              |                            | Lattice Libration               | h                                                                    |
| 118.00m                    | 117.76                     |                              |                            | Molecular Libration             | e                                                                    |
| 123.00s                    | 121.44                     |                              |                            | Molecular Libration             | b                                                                    |
|                            | 127.05                     |                              |                            | Molecular Libration             | a                                                                    |
| -                          | 127.55                     |                              |                            | Molecular Libration             | g                                                                    |
| 136.00m                    | 130.58                     |                              |                            | Lattice deformation             | f                                                                    |
| -                          | 141.24                     |                              |                            | Lattice deformation             | h                                                                    |
| -                          | 148.06                     |                              |                            | Lattice deformation             | g                                                                    |
| -                          | 150.18                     |                              |                            | Lattice deformation             | c                                                                    |
| 151.00sh                   | 153.26                     |                              |                            | Lattice deformation             | h                                                                    |
| -                          | 155.43                     |                              |                            | Lattice deformation             | b                                                                    |

|          |        |          |        |                           |   |
|----------|--------|----------|--------|---------------------------|---|
| -        | 156.18 |          |        | Lattice deformation       | d |
| 159.00s  | 158.95 |          |        | Lattice deformation       | g |
|          | 161.83 |          |        | Lattice deformation       | h |
| 164.00s  | 165.42 |          |        | Lattice deformation       | e |
|          | 173.77 |          |        | Lattice deformation       | c |
| -        | 175.08 |          |        | Lattice deformation       | d |
| 181.00s  | 182.26 |          |        | Lattice deformation       | c |
| -        | 182.47 |          |        | Lattice deformation       | d |
|          | 186.78 |          |        | Lattice deformation       | b |
| -        | 186.81 |          |        | Lattice deformation       | e |
|          | 190.03 |          |        | Lattice deformation       | h |
| 192.00s  | 191.69 |          |        | Lattice deformation       | g |
| 198.00m  | 208.67 |          |        | Lattice deformation       | f |
| 204.00m  | 210.08 |          |        | Lattice deformation       | a |
| 211.00m  | 211.65 |          |        | Lattice deformation       | a |
|          | 217.08 |          |        | Lattice deformation       | f |
|          | 219.45 |          |        | Lattice deformation       | b |
| 221.00sh | 223.69 |          |        | Lattice deformation       | e |
| 226.00m  | 227.40 |          |        | Lattice deformation       | c |
| 231.00s  | 233.19 | 231.00br | 232.00 | Lattice deformation       | d |
| -        | 236.80 |          |        | Lattice deformation       | h |
| 243.00sh | 237.57 |          |        | Lattice deformation       | g |
| 247.00sh | 240.60 |          |        | Lattice deformation       | d |
| 250.00s  | 243.32 |          |        | Lattice deformation       | e |
| 260.00s  | 243.51 |          |        | Lattice deformation       | b |
| 270.00s  | 247.99 |          |        | Lattice deformation       | c |
| -        | 248.47 |          |        | Lattice deformation       | a |
| 279.00s  | 275.02 |          |        | Lattice deformation       | f |
|          | 284.62 |          |        | Lattice deformation       | e |
| 288.00sh | 287.63 |          |        | Lattice deformation       | b |
| 294.00m  | 297.08 |          |        | Lattice deformation       | h |
| 302.00w  | 297.68 |          |        | Lattice deformation       | a |
| 308.00w  | 300.80 |          |        | Lattice deformation       | g |
| 315.00w  | 318.15 |          |        | Lattice deformation       | f |
| 340.00m  | 343.60 |          |        | BH <sub>3</sub> Libration | b |
| 347.00s  | 347.08 |          |        | BH <sub>3</sub> Libration | e |
| 362.00sh | 368.70 |          |        | BH <sub>3</sub> Libration | f |
| 366.00sh | 368.73 |          |        | BH <sub>3</sub> Libration | g |
|          | 369.06 |          |        | BH <sub>3</sub> Libration | a |
| 373.00m  | 371.96 |          |        | BH <sub>3</sub> Libration | h |
| 398.00sh | 397.27 |          |        | BH <sub>3</sub> Libration | c |
| 402.00w  | 397.74 |          |        | BH <sub>3</sub> Libration | d |
| 416.00w  |        |          |        |                           |   |
| 425.00w  | 429.48 |          |        | NH <sub>2</sub> Libration | g |
| 450.00sh | 442.66 |          |        | NH <sub>2</sub> Libration | h |
| 451.00sh | 447.81 |          |        | NH <sub>2</sub> Libration | b |
| 460.00s  | 458.73 |          |        | NH <sub>2</sub> Libration | e |
| 478.00s  | 474.81 |          |        | NH <sub>2</sub> Libration | c |
| 479.00s  | 476.19 | 463.00m  | 473.00 | N-Li stretch              | d |

|           |         |              |         |                                           |   |
|-----------|---------|--------------|---------|-------------------------------------------|---|
| 480.00s   | 480.92  |              |         | NH <sub>2</sub> Libration                 | a |
| 481.00s   | 483.64  |              |         | NH <sub>2</sub> Libration                 | a |
| -         | 485.24  |              |         | NH <sub>2</sub> Libration                 | c |
| 489.00sh  | 488.06  |              |         | NH <sub>2</sub> Libration                 | f |
| -         | 490.80  |              |         | NH <sub>2</sub> Libration                 | g |
| 494.00w   | 494.01  |              |         | N-Li stretch                              | d |
|           | 496.17  |              |         | N-Li stretch + NH <sub>2</sub> Libration  | h |
|           | 496.18  |              |         | NH <sub>2</sub> Libration                 | b |
|           | 499.65  |              |         | N-Li stretch + NH <sub>2</sub> Libration  | f |
| 529.00w   | 511.01  |              |         | N-Li stretch + NH <sub>2</sub> Libration  | e |
| 792.00sh  | 794.86  |              |         | NH <sub>2</sub> Rocking                   | c |
| 801.00m   | 797.76  |              |         | NH <sub>2</sub> + BH <sub>3</sub> Rocking | a |
| 808.00m   | 814.74  |              |         | NH <sub>2</sub> + BH <sub>3</sub> Rocking | g |
| 813.00m   | 815.22  |              |         | NH <sub>2</sub> + BH <sub>3</sub> Rocking | b |
| 818.00m   | 821.44  |              |         | NH <sub>2</sub> + BH <sub>3</sub> Rocking | d |
| 824.00m   | 823.03  | 820.00m      | 821.90  | NH <sub>2</sub> + BH <sub>3</sub> Rocking | f |
| 825.00m   | 825.79  |              |         | NH <sub>2</sub> + BH <sub>3</sub> Rocking | e |
| 827.00sh  | 825.96  |              |         | NH <sub>2</sub> + BH <sub>3</sub> Rocking | h |
| 829.00sh  | 829.91  |              |         | NH <sub>2</sub> + BH <sub>3</sub> Rocking | b |
| -         | 831.71  |              |         | NH <sub>2</sub> + BH <sub>3</sub> Rocking | g |
| 834.00sh  | 836.00  |              |         | NH <sub>2</sub> + BH <sub>3</sub> Rocking | d |
|           | 838.04  |              |         | NH <sub>2</sub> + BH <sub>3</sub> Rocking | c |
|           | 839.84  |              |         | NH <sub>2</sub> + BH <sub>3</sub> Rocking | a |
| 845.00s   | 842.74  |              |         | NH <sub>2</sub> + BH <sub>3</sub> Rocking | f |
|           | 856.52  |              |         | NH <sub>2</sub> + BH <sub>3</sub> Rocking | e |
| 865.00s   | 858.63  |              |         | NH <sub>2</sub> + BH <sub>3</sub> Rocking | h |
| 874.00sh  |         |              |         | NH <sub>2</sub> + BH <sub>3</sub> Rocking |   |
| 889.00w   | 893.72  |              |         | B-N Stretch                               | d |
| 889.00w   | 893.99  |              |         | B-N Stretch                               | c |
| 903.00sh  | 895.09  | 902.00m      | 895.80  | B-N Stretch                               | b |
| 914.00w   | 895.10  |              |         | B-N Stretch                               | f |
| 924.00w   | 895.23  |              |         | B-N Stretch                               | a |
| 942.00w   | 896.69  |              |         | B-N Stretch                               | g |
| 985.00w   | 897.94  |              |         | NH <sub>2</sub> + BH <sub>3</sub> Rocking | e |
| -         | 898.86  |              |         | NH <sub>2</sub> + BH <sub>3</sub> Rocking | h |
| 1009.00sh | 1013.36 |              |         | NH <sub>2</sub> + BH <sub>3</sub> Rocking | a |
|           | 1014.18 |              |         | NH <sub>2</sub> + BH <sub>3</sub> Rocking | c |
| 1021.00s  | 1021.21 |              |         | NH <sub>2</sub> + BH <sub>3</sub> Rocking | b |
| -         | 1023.91 |              |         | NH <sub>2</sub> + BH <sub>3</sub> Rocking | d |
| -         | 1024.42 |              |         | NH <sub>2</sub> + BH <sub>3</sub> Rocking | g |
|           | 1026.84 | 1028.00w vbr | 1022.00 | NH <sub>2</sub> + BH <sub>3</sub> Rocking | f |
| 1062.00w  | 1035.38 |              |         | NH <sub>2</sub> + BH <sub>3</sub> Rocking | e |
|           | 1037.72 |              |         | NH <sub>2</sub> + BH <sub>3</sub> Rocking | h |
| 1110.00w  | 1122.30 |              |         | NH <sub>2</sub> + BH <sub>3</sub> Rocking | h |
| -         | 1122.56 |              |         | NH <sub>2</sub> + BH <sub>3</sub> Rocking | e |
| -         | 1125.04 |              |         | NH <sub>2</sub> + BH <sub>3</sub> Rocking | b |

|            |         |              |         |                                           |   |
|------------|---------|--------------|---------|-------------------------------------------|---|
| -          | 1125.20 |              |         | NH <sub>2</sub> + BH <sub>3</sub> Rocking | g |
| 1128.00w   | 1128.97 |              |         | NH <sub>2</sub> + BH <sub>3</sub> Rocking | d |
|            | 1133.52 | 1131.00w vbr | 1128.90 | NH <sub>2</sub> + BH <sub>3</sub> Rocking | c |
| 1139.00mbr | 1134.28 |              |         | NH <sub>2</sub> + BH <sub>3</sub> Rocking | f |
| 1143.00w   | 1138.44 |              |         | B-N Stretch + BH <sub>3</sub> Rocking     | a |
| 1151.00mbr | 1154.62 |              |         | B-N Stretch + BH <sub>3</sub> Rocking     | b |
| 1153.00m   | 1155.28 |              |         | B-N Stretch + BH <sub>3</sub> Rocking     | g |
| 1174.00sh  | 1155.68 |              |         | B-N Stretch + BH <sub>3</sub> Rocking     | a |
| 1197.00m   | 1157.27 |              |         | B-N Stretch + BH <sub>3</sub> Rocking     | e |
| -          | 1157.66 |              |         | B-N Stretch + BH <sub>3</sub> Rocking     | h |
| -          | 1162.18 |              |         | B-N Stretch + BH <sub>3</sub> Rocking     | d |
| -          | 1164.03 |              |         | B-N Stretch + BH <sub>3</sub> Rocking     | c |
| -          | 1164.57 | 1167.00w vbr | 1158.90 | B-N Stretch + BH <sub>3</sub> Rocking     | f |
| -          | 1238.00 |              |         | BH <sub>3</sub> Wagging                   | d |
| -          | 1238.46 |              |         | BH <sub>3</sub> Wagging                   | c |
| -          | 1240.97 |              |         | BH <sub>3</sub> Wagging                   | h |
| -          | 1241.09 |              |         | BH <sub>3</sub> Wagging                   | g |
| -          | 1243.01 |              |         | BH <sub>3</sub> Wagging                   | a |
| -          | 1243.78 |              |         | BH <sub>3</sub> Wagging                   | f |
| -          | 1244.07 |              |         | BH <sub>3</sub> Wagging                   | e |
| -          | 1244.11 |              |         | BH <sub>3</sub> Wagging                   | b |
| -          | 1256.95 |              |         | BH <sub>3</sub> Wagging                   | f |
| -          | 1257.79 |              |         | BH <sub>3</sub> Wagging                   | a |
| -          | 1257.92 |              |         | BH <sub>3</sub> Wagging                   | d |
| -          | 1258.10 |              |         | BH <sub>3</sub> Wagging                   | h |
| 1271.00s   | 1258.71 |              |         | BH <sub>3</sub> Wagging                   | c |
| 1284.00sh  | 1258.88 |              |         | BH <sub>3</sub> Wagging                   | g |
| 1405.00w   | 1261.32 | 1260.00m     | 1237.70 | BH <sub>3</sub> Wagging                   | e |
| 1462.00w   | 1262.01 |              | 1257.90 | BH <sub>3</sub> Wagging                   | b |
| 1538.00m   | 1563.13 | 1536.00w     | 1571.00 | NH <sub>2</sub> Wagging                   | g |
| 1559.00sh  | 1563.20 |              |         | NH <sub>2</sub> Wagging                   | b |
| 1566.00w   | 1568.04 |              |         | NH <sub>2</sub> Wagging                   | e |
| -          | 1568.10 |              |         | NH <sub>2</sub> Wagging                   | h |
| -          | 1570.07 |              |         | NH <sub>2</sub> Wagging                   | a |
| -          | 1574.49 |              |         | NH <sub>2</sub> Wagging                   | d |
| -          | 1574.81 |              |         | NH <sub>2</sub> Wagging                   | f |
| -          | 1577.78 |              |         | NH <sub>2</sub> Wagging                   | c |
| -          |         |              |         | NH <sub>2</sub> Wagging                   |   |
| 1615.00w   |         |              |         | NH <sub>2</sub> Wagging                   |   |
| 1631.00w   |         |              |         | NH <sub>2</sub> Wagging                   |   |
| 1715.00w   |         |              |         | NH <sub>2</sub> Wagging                   |   |
| 1876.00w   |         |              |         | Asymmetric B-H stretch                    |   |
| 2148.00b   | 2190.95 | 2152.00mbr   | 2190.10 | Asymmetric B-H stretch                    | a |
| 2160.00w   | 2191.41 |              |         | Asymmetric B-H stretch                    | d |
| -          | 2192.77 | 2190.00mbr   | 2230.90 | Asymmetric B-H stretch                    | f |
| -          | 2197.51 |              |         | Asymmetric B-H stretch                    | c |

|            |         |            |         |                        |   |
|------------|---------|------------|---------|------------------------|---|
| -          | 2199.14 |            |         | Asymmetric B-H stretch | b |
| -          | 2199.97 |            |         | Asymmetric B-H stretch | e |
| -          | 2200.37 |            |         | Asymmetric B-H stretch | g |
| -          | 2200.72 |            |         | Asymmetric B-H stretch | h |
| 2202.00mb  | 2231.78 |            |         | Asymmetric B-H stretch | d |
| 2223.00sh  | 2232.48 |            |         | Asymmetric B-H stretch | c |
| 2223.00sh  | 2233.79 |            |         | Asymmetric B-H stretch | h |
|            | 2234.73 |            |         | Asymmetric B-H stretch | g |
| -          | 2239.28 |            |         | Symmetric B-H stretch  | a |
| -          | 2244.17 |            |         | Symmetric B-H stretch  | b |
| -          | 2244.32 |            |         | Asymmetric B-H stretch | e |
|            | 2246.10 |            |         | Asymmetric B-H stretch | f |
| -          | 2304.78 |            |         | Asymmetric B-H stretch | g |
| -          | 2306.83 | 2252.00mbr | 2310.00 | Symmetric B-H stretch  | h |
| 2292.00m   | 2311.49 |            |         | Asymmetric B-H stretch | c |
| -          | 2311.55 |            |         | Asymmetric B-H stretch | d |
| -          | 2315.23 |            |         | Asymmetric B-H stretch | a |
| -          | 2321.64 |            |         | Asymmetric B-H stretch | b |
| 2316.00sh  | 2322.41 |            |         | Asymmetric B-H stretch | e |
| 2383.00w   | 2326.91 | 2372.00w   |         | Asymmetric B-H stretch | f |
| -          | 3382.23 |            |         | Asymmetric B-H stretch | f |
|            | 3382.30 |            |         | Symmetric N-H stretch  | d |
| 3279.00w   | 3382.61 |            | -       | Symmetric N-H stretch  | a |
|            | 3382.98 | 3303.00s   | 3381.90 | Symmetric N-H stretch  | c |
| -          | 3384.94 |            |         | Symmetric N-H stretch  | g |
| -          | 3384.97 |            |         | Symmetric N-H stretch  | b |
| -          | 3385.55 |            |         | Symmetric N-H stretch  | h |
| -          | 3385.63 |            |         | Symmetric N-H stretch  | e |
| -          | 3453.04 |            |         | Asymmetric N-H stretch | b |
|            | 3453.08 |            |         | Asymmetric N-H stretch | g |
|            | 3453.62 |            |         | Asymmetric N-H stretch | h |
|            | 3453.95 |            |         | Asymmetric N-H stretch | e |
|            | 3454.14 |            |         | Asymmetric N-H stretch | f |
|            | 3454.23 |            |         | Asymmetric N-H stretch | d |
|            | 3454.51 |            |         | Asymmetric N-H stretch | a |
| 3459.00wbr | 3454.99 |            |         | Asymmetric N-H stretch | c |
| 3520.00w   |         | 3360.00s   | 3453.50 | Asymmetric N-H stretch |   |

s, strong; m,medium; w, weak; sh, shoulder; br, broad; v, very.

|          | Rep             | Mul | E | 2  | 2  | 2  | I  | m  | m  | m  |
|----------|-----------------|-----|---|----|----|----|----|----|----|----|
| <b>a</b> | B3 <sub>u</sub> | 24  | 1 | -1 | -1 | 1  | -1 | 1  | 1  | -1 |
| <b>b</b> | B2 <sub>u</sub> | 24  | 1 | -1 | 1  | -1 | -1 | 1  | -1 | 1  |
| <b>c</b> | B1 <sub>u</sub> | 24  | 1 | 1  | -1 | -1 | -1 | -1 | 1  | 1  |
| <b>d</b> | A <sub>g</sub>  | 24  | 1 | 1  | 1  | 1  | 1  | 1  | 1  | 1  |
| <b>e</b> | B3 <sub>g</sub> | 24  | 1 | -1 | -1 | 1  | 1  | -1 | -1 | 1  |
| <b>f</b> | B2 <sub>g</sub> | 24  | 1 | -1 | 1  | -1 | 1  | -1 | 1  | -1 |
| <b>g</b> | A <sub>u</sub>  | 24  | 1 | 1  | 1  | 1  | -1 | -1 | -1 | -1 |
| <b>h</b> | B1 <sub>g</sub> | 24  | 1 | 1  | -1 | -1 | 1  | 1  | -1 | -1 |

**Table 4** Calculated Born charge tensors for  $\alpha$ -LiNH<sub>2</sub>BH<sub>3</sub>.

| Atom | $q_{11}$ | $q_{22}$ | $q_{33}$ | $q_{23}$ | $q_{13}$ | $q_{12}$ |
|------|----------|----------|----------|----------|----------|----------|
| H1   | -0.11428 | -0.17528 | -0.12744 | 0.06089  | 0.03972  | -0.06006 |
| H2   | -0.14906 | -0.07380 | -0.12364 | -0.02856 | -0.05881 | -0.01488 |
| H3   | -0.08683 | -0.11426 | -0.18155 | -0.04977 | 0.04181  | 0.02611  |
| H4   | 0.04859  | 0.07771  | 0.09714  | -0.02309 | -0.02960 | 0.01423  |
| H5   | 0.06910  | 0.09538  | 0.04320  | -0.01739 | 0.03008  | 0.04036  |
| Li   | 0.29166  | 0.34311  | 0.36900  | 0.02631  | 0.04024  | 0.00533  |
| B    | 0.20115  | 0.28676  | 0.17458  | -0.02807 | 0.00894  | -0.08635 |
| N    | -0.26031 | -0.43961 | -0.25126 | -0.07826 | 0.01836  | 0.06990  |

**Table 5** Calculated atomic displacements and comparison of they increase with temperature from 100K-300K.

| Atom | Atomic Displacement (Å) |          |          |          |          | Amplitude Increase |          |          |          |
|------|-------------------------|----------|----------|----------|----------|--------------------|----------|----------|----------|
|      | T=70K                   | T=100K   | T=200K   | T=300K   | T=370K   | T=100K             | T=200K   | T=300K   | T=370K   |
| H1-B | 0.026415                | 0.027729 | 0.033962 | 0.042078 | 0.048428 | 0.001314           | 0.007547 | 0.015663 | 0.022013 |
| H2-B | 0.023803                | 0.025256 | 0.031749 | 0.039916 | 0.046226 | 0.001453           | 0.007946 | 0.016113 | 0.022423 |
| H3-B | 0.024821                | 0.025892 | 0.031564 | 0.0393   | 0.045399 | 0.001071           | 0.006743 | 0.014479 | 0.020578 |
| H4-N | 0.023723                | 0.025379 | 0.034075 | 0.045205 | 0.053612 | 0.001656           | 0.010352 | 0.021482 | 0.029889 |
| H5-N | 0.025293                | 0.026925 | 0.036219 | 0.04827  | 0.057364 | 0.001632           | 0.010926 | 0.022977 | 0.032071 |
| Li   | 0.019168                | 0.020717 | 0.028227 | 0.037594 | 0.044636 | 0.001549           | 0.009059 | 0.018426 | 0.025468 |
| B    | 0.010965                | 0.012283 | 0.017972 | 0.024591 | 0.029464 | 0.001318           | 0.007007 | 0.013626 | 0.018499 |
| N    | 0.010924                | 0.012379 | 0.018824 | 0.026263 | 0.031691 | 0.001455           | 0.0079   | 0.015339 | 0.020767 |
